# Supplementary material
Source: HighWire-hosted journal article supplement (https://jnis.bmj.com/content/neurintsurg-2021-017469)
Supplement: inline-supplementary-material-1 [file inline-supplementary-material-1.pdf]

## Appendix 1: Eligibility Criteria (Protocol Revision 4)

### Inclusion Criteria

Subjects met ALL of the criteria listed below:

Age  $\geq 22$  and  $\leq 75$  years;

Subject had a single target aneurysm located in the following zones:

- Zone 1 - Petrous through superior hypophyseal segments of the ICA
- Zone 2 - Communicating segment of the ICA through A1 or M1 segment
- Zone 3 - Posterior Circulation
  - Basilar artery (not including the basilar bifurcation)
  - Vertebral artery (distal to the PICA)
  - Vertebral artery (proximal to the PICA)

As well as any of the following criteria:

Subject for whom existing endovascular options (coiling, stent-assisted coiling) would have been ineffective because the aneurysm was predisposed to recurrence due to having any of the following characteristics:

- a) Aneurysm had a maximum fundus diameter less than 10mm but  $\geq 2$ mm.
- i. To mitigate the risk for the treatment of subjects with small stable aneurysms that may not require treatment with respect to the possible risks and benefits associated with treatment, the treating clinician had to record a treatment

justification (such as increased risk of rupture) for the aneurysms < 7mm that were selected for treatment.

b) Aneurysm had any of the following morphologies:

- i. No discernible neck.
- ii. Segmental parent artery dysplasia.
- iii. Aneurysm neck involving > 180 degrees of parent artery circumference.
- iv. Complex lobulations limiting stent/coiling as a treatment option
- v. Neck > 4mm or dome/neck ratio  $\leq 2$ .

**OR**

Subject had a fusiform aneurysm of any size requiring treatment.

**OR**

Subject was a poor candidate for open surgical treatment because of prior surgical procedures, comorbidities or location limiting conventional surgical options.

Additionally, the subjects met the following criteria:

The parent artery diameter was 2.0 - 5.0mm distal and/or proximal to the target intracranial aneurysm;

Subject fulfilled study requirements, and the subject or his/her Legally Authorized

Representative provided a signed informed consent form;

Negative pregnancy test (serum or urine) in a female subject who has had menses in the last 18 months;

Subject committed to return to the investigational site for the 30-day, 180-day, and 12-month follow-up evaluations.

### **Exclusion Criteria**

Subjects were excluded from the study if ANY of the following conditions existed:

Subject who suffered from a subarachnoid hemorrhage in the last 60 days;

Subject who suffered from any intracranial hemorrhage in the last 30 days;

Subject who presented with an intracranial mass or was currently undergoing radiation therapy for carcinoma or sarcoma of the head or neck region;

Subject with symptomatic extracranial or intracranial stenosis of the parent artery (>50%) proximal to the target aneurysm;

Subject with an irreversible bleeding disorder, a platelet count of less than 100,000/ml <  $100 \times 10^3$  cells/mm<sup>3</sup> or known platelet dysfunction or a contraindication to or inability to tolerate anticoagulants/antiplatelet agents;

Active peptic ulcer disease, major systemic hemorrhage within 30 days, active bleeding diathesis, platelet < 100,000 or known platelet dysfunction, INR  $\geq$  1.5, clotting factor abnormality, current alcohol or substance abuse, uncontrolled severe hypertension

(systolic pressure >180 mm Hg or diastolic pressure >115 mmHg), creatinine  $\geq$  3.0

mg/dL (unless on dialysis);

Subject with contraindications or known allergies to anticoagulants or antiplatelets

(aspirin, heparin, ticlopidine, clopidogrel, prasugrel or ticagrelor);

Subject with known hypersensitivity to metal, such as nickel-titanium and metal jewelry;

Subject with documented contrast allergy, or other condition, that prohibits imaging;

Evidence of active infection at the time of treatment;

Presence of any of the following unequivocal cardiac sources of embolism; chronic or

paroxysmal atrial fibrillation, mitral stenosis, mechanical valve, endocarditis,

intracardiac clot or vegetation, myocardial infarction within three months, dilated

cardiomyopathy, left atrial spontaneous echo contrast, ejection fraction less than 30%;

Subject who had a previous intracranial stenting procedure associated with the target aneurysm;

Subject who was unable to complete the required follow-ups;

Subject with life-threatening diseases;

Subject who was pregnant or breastfeeding;

Subject of childbearing potential, and unwilling to prevent pregnancy during their participation in the study.

Angiographic exclusion criteria:

Subject had a cerebral diagnostic angiogram that demonstrated an aneurysm that was not appropriate for endovascular treatment;

Subject had an extracranial stenosis greater than 50% in the carotid artery of the target aneurysm;

Subject had an intracranial stenosis greater than 50% in the treated vessel;

Subject had a mycotic or dissecting aneurysm;

Subject had a bifurcation aneurysm for example at the bifurcation of the internal carotid artery, the middle cerebral artery or at the anterior communicating artery such that placement of the device would fail to satisfactorily cover the entire neck of the aneurysm or a major cerebral artery would be put at risk through “jailing”;

Subject had a posterior circulation aneurysm with the following morphology:

Placement of the device would include the basilar artery bifurcation

Large or giant dolichoectatic aneurysm;

Subjects aneurysm had significant branch exiting from dome of aneurysm (for example, ophthalmic artery);

Subject was harboring more than one aneurysm with both aneurysms requiring treatment at the same time;

Subject had an arteriovenous malformation (AVM) in the area of the target aneurysm.

## Appendix 2: Derivation of Performance Goals (PG)

A search of the published literature on flow diverters for the endovascular treatment of intracranial aneurysms was conducted to establish clinical study performance goals for safety and effectiveness. The focus of the safety performance goal was the rates major complications and the focus of the effectiveness performance goal was the rates complete angiographic occlusion within the first year of treatment.

The search criteria are outlined below:

| <b>Inclusion criteria</b> |                                                                                                                                                                                                                                                                                                                              |
|---------------------------|------------------------------------------------------------------------------------------------------------------------------------------------------------------------------------------------------------------------------------------------------------------------------------------------------------------------------|
| Condition                 | Intracranial aneurysm OR cerebral aneurysm OR brain aneurysm<br>In-stent stenosis                                                                                                                                                                                                                                            |
| Time period               | 2007 or later                                                                                                                                                                                                                                                                                                                |
| Treatment                 | flow diverter OR flow diversion, Pipeline, Silk, Surpass                                                                                                                                                                                                                                                                     |
| Available data            | Published results in full (i.e. not only in abstract) and in a peer reviewed journal, book or online publication<br>Aneurysm location<br>12-month follow-up and angiographic data<br>Safety outcomes peri-procedurally, within 30 days, or within 12 months<br>Reports of death, ischemic safety events, non-ischemic events |
| Population                | identifiable population or sub-population of aneurysms consistent with the target populations defined in the FRED protocol                                                                                                                                                                                                   |
| <b>Exclusion criteria</b> |                                                                                                                                                                                                                                                                                                                              |
| Types of studies          | Animal, pediatric, imaging techniques, reviews/meta-analyses, overlapping cohorts, psycho/social outcomes, economic/cost analysis outcomes, long-term follow-up only                                                                                                                                                         |
| Anatomical                | Non-cerebral OR non-intracranial<br>Aneurysms not intended for treatment with FRED                                                                                                                                                                                                                                           |
| Treatment                 | FRED device, liquid embolic agents, clipping, coiling, stent assisted coiling                                                                                                                                                                                                                                                |

The search yielded 15 articles for reference for effectiveness, with an additional 21 for reference for additional in-stent stenosis information and 14 articles for safety. The rates obtained from the publications were stratified by anatomical location (anterior or posterior). Results were combined across studies, within anatomic location, to obtain estimates of the applicable event rates using inverse variance weighting, as described by Fleiss<sup>1</sup>.

The combined estimates obtained for each anatomic location were then combined using the proportion of subjects treated in each of the two anatomic locations in order to obtain a single comparator rate for the endpoint. A target performance goal rate was subsequently obtained by applying separate offsets for the primary safety and efficacy endpoints reflecting weighting estimates for anterior and posterior distributions.

### Effectiveness endpoint

The primary efficacy endpoint for the FRED study is based on a core lab's assessment of occlusion. In order to account for this, success rates were adjusted down by 12% in publications that did not report results from a core lab assessment. The FRED endpoint also includes as a failure any in-stent stenosis greater than or equal to 50% within one year of treatment. Not all publications reported on in-stent stenosis. A 3.8% downward adjustment was applied to those publications that did not report their own rate.

There were 15 publications included in the analysis that reported data for aneurysms located anterior circulation. The sample sizes ranged from 11 to 108 treated aneurysms and the resulting 100% occlusion rates ranged from 30.8% to 100%. The Fleiss method was applied to the rates of total occlusion of aneurysms with adjustment for core laboratory and in stent stenosis resulting in a combined estimate for effectiveness for the anterior location of 56.2%.

**Table 1: Listing of anterior effectiveness publications**

| Author            | Year | % w/100% occlusion | # In Stent Stenosis ≥50% |
|-------------------|------|--------------------|--------------------------|
| Bescke            | 2013 | 86.8%              | 1                        |
| Briganti          | 2014 | 89.2%              | Not reported             |
| Chalouhi          | 2014 | 79.5%              | Not reported             |
| Brinjiki          | 2014 | 45.5%              | Not reported             |
| Chan              | 2011 | 69.2%              | 0                        |
| Cinar             | 2013 | 92.9%              | 0                        |
| Keskin            | 2015 | 100.0%             | Not reported             |
| Kim               | 2014 | 70.8%              | Not reported             |
| Lubicz            | 2011 | 75.0%              | 0                        |
| Martinez-Galdamez | 2014 | 40.0%              | 2                        |
| Monteith          | 2014 | 30.8%              | 0                        |
| Mpotsaris         | 2015 | 50.0%              | 0                        |
| Puffer            | 2014 | 61.8%              | 2                        |
| Szikora           | 2010 | 94.1%              | 0                        |
| Wagner            | 2011 | 72.2%              | 6                        |

There were 9 publications included in the analysis that reported data for aneurysms located in the posterior location. The sample sizes ranged from 1 to 7 subjects and the resulting 100% occlusion rates ranged from 0% to 100%. There were 7 publications with 100% success rates; these 7 publications had to be combined with other publications in order to facilitate analysis. The Fleiss method was applied to the rates of total occlusion of aneurysms with adjustment for

core laboratory and in stent stenosis resulting in a combined estimate for effectiveness for the posterior location of 45.8%.

**Table 2: Listing of posterior effectiveness publications**

| Analysis Grouping | Author            | Year | % w/100 occlusion | # In Stent Stenosis $\geq 50\%$ |
|-------------------|-------------------|------|-------------------|---------------------------------|
| A                 | Briganti          | 2014 | 100.0%            | Not reported                    |
| A                 | Cinar             | 2007 | 50.0%             | 0                               |
| A                 | Keskin            | 2015 | 100.0%            | Not reported                    |
| D                 | Lubicz            | 2011 | 66.7%             | 0                               |
| B                 | Martinez-Galdamez | 2014 | 100.0%            | 0                               |
| C                 | Monteith          | 2014 | 28.6%             | 0                               |
| E                 | Mpotsaris         | 2015 | 33.3%             | 0                               |
| B                 | Szikora           | 2010 | 100.0%            | 0                               |
| B                 | Wagner            | 2011 | 66.7%             | 0                               |

Applying the weights to the anterior and posterior rates reflecting the natural occurrence, the final combined estimate was 53.8%. Applying the non-inferiority margin, the lower limit of the 95% confidence interval and resulting target performance goal becomes 45.8%.

#### **Safety endpoint**

The primary safety endpoint for the FRED study requires freedom from death, stroke and MI w/in 30 days as well as freedom from major ipsilateral stroke and neurological death within 12 months.

There were 13 publications included in the analysis that reported data for aneurysms located in the anterior location. The sample sizes ranged from 9 to 738 treated aneurysms and the resulting composite endpoint rate ranged from 0% to 25%. The Fleiss method was applied to the composite rate resulting in a combined estimate for safety for the anterior location of 5.96%.

**Table 3: Listing of anterior safety publications**

| Author   | Year | Composite Endpoint Rate |
|----------|------|-------------------------|
| Becske   | 2013 | 5.6%                    |
| Briganti | 2014 | 6.1%                    |
| Chalouhi | 2014 | 2.5%                    |
| Chan     | 2011 | 0.0%                    |
| Cinar    | 2013 | 2.6%                    |
| Kallmes  | 2015 | 7.0%                    |
| Keskin   | 2015 | 0.0%                    |



|                   |      |       |
|-------------------|------|-------|
| Kim               | 2014 | 4.3%  |
| Lubicz            | 2011 | 9.1%  |
| Martinez-Galdamez | 2014 | 25.0% |
| Monteith          | 2014 | 5.9%  |
| Mpotsaris         | 2015 | 8.3%  |
| Wagner            | 2011 | 14.3% |

There were 9 publications included in the analysis that reported data for aneurysms located in the posterior location. The sample sizes ranged from 1 to 55 treated aneurysms and the resulting composite endpoint rate ranged from 0% to 100%. The Fleiss method was applied to the composite rate resulting in a combined estimate for safety for the posterior location of 17%.

**Table 4: Listing of posterior safety publications**

| Author            | Year | Composite Endpoint Rate |
|-------------------|------|-------------------------|
| Briganti          | 2014 | 0.00%                   |
| Cinar             | 2007 | 33.33%                  |
| Kallmes           | 2015 | 18.18%                  |
| Lubicz            | 2011 | 0.00%                   |
| Keskin            | 2015 | 100.00%                 |
| Martinez-Galdamez | 2014 | 0.00%                   |
| Monteith          | 2014 | 28.57%                  |
| Mpotsaris         | 2015 | 33.33%                  |
| Wagner            | 2011 | 0.00%                   |

Applying the same weights to the anterior and posterior rates, the final combined estimate was 7.5%. Applying the non-inferiority margin, the upper limit of the 95% confidence interval and resulting target performance goal becomes 15%.

#### Reference list

1. Fleiss, J. (1993). The statistical basis of meta-analysis. *Statistical Methods in Medical Research* 2: 121-145.

#### Effectiveness / Safety Analysis

2. Becske T, Kallmes DF, Saatci I, McDougall CG, Szikora I, Lanzino G, et al. Pipeline for uncoilable or failed aneurysms: Results from a multicenter clinical trial. *Radiology*. 2013;267:858-868
3. Briganti F, Napoli M, Leone G, Marseglia M, Mariniello G, Caranci F, et al. Treatment of intracranial aneurysms by flow diverter devices: Long-term results from a single center. *Eur J Radiol*. 2014;83:1683-1690

4. Brinjikji W, Lanzino G, Cloft HJ, Kallmes DF. Patency of the posterior communicating artery after flow diversion treatment of internal carotid artery aneurysms. *Clin Neurol Neurosurg*. 2014;120:84-88
5. Chalouhi N, Starke RM, Yang S, Bovenzi CD, Tjoumakaris S, Hasan D, et al. Extending the indications of flow diversion to small, unruptured, saccular aneurysms of the anterior circulation. *Stroke*. 2014;45:54-58
6. Chan TT, Chan KY, Pang PK, Kwok JC. Pipeline embolisation device for wide-necked internal carotid artery aneurysms in a hospital in hong kong: Preliminary experience. *Hong Kong Med J*. 2011;17:398-404
7. Cinar C, Bozkaya H, Oran I. Endovascular treatment of cranial aneurysms with the pipeline flow-diverting stent: Preliminary mid-term results. *Diagn Interv Radiol*. 2013;19:154-164
8. Kallmes DF, Hanel R, Lopes D, Boccardi E, Bonafe A, Cekirge S, et al. International retrospective study of the pipeline embolization device: A multicenter aneurysm treatment study. *AJNR Am J Neuroradiol*. 2015;36:108-115
9. Keskin F, Erdi F, Kaya B, Poyraz N, Keskin S, Kalkan E, et al. Endovascular treatment of complex intracranial aneurysms by pipeline flow-diverter embolization device: A single-center experience. *Neurol Res*. 2015;37:359-365
10. Kim LJ, Tariq F, Levitt M, Barber J, Ghodke B, Hallam DK, et al. Multimodality treatment of complex unruptured cavernous and paraclinoid aneurysms. *Neurosurgery*. 2014;74:51-61; discussion 61; quiz 61
11. Lubicz B, Collignon L, Raphaeli G, De Witte O. Pipeline flow-diverter stent for endovascular treatment of intracranial aneurysms: Preliminary experience in 20 patients with 27 aneurysms. *World Neurosurg*. 2011;76:114-119
12. Martinez-Galdamez M, Romance A, Vega P, Vega A, Caniego JL, Paul L, et al. Pipeline endovascular device for the treatment of intracranial aneurysms at the level of the circle of willis and beyond: Multicenter experience. *J Neurointerv Surg*. 2014
13. Monteith SJ, Tsimpas A, Dumont AS, Tjoumakaris S, Gonzalez LF, Rosenwasser RH, et al. Endovascular treatment of fusiform cerebral aneurysms with the pipeline embolization device. *J Neurosurg*. 2014;120:945-954
14. Mpotsaris A, Skalej M, Beuing O, Eckert B, Behme D, Weber W. Long-term occlusion results with silk flow diversion in 28 aneurysms: Do recanalizations occur during follow-up? *Interv Neuroradiol*. 2015;21:300-310
15. PITA Study, as prepared for the Neurologic Devices Panel. (2011). FDA Executive Summary - Pipeline Embolization Device.
16. Puffer RC, Piano M, Lanzino G, Valvassori L, Kallmes DF, Quilici L, et al. Treatment of cavernous sinus aneurysms with flow diversion: Results in 44 patients. *AJNR Am J Neuroradiol*. 2014;35:948-951
17. Szikora I, Berentei Z, Kulcsar Z, Marosfoi M, Vajda ZS, Lee W, et al. Treatment of intracranial aneurysms by functional reconstruction of the parent artery: The budapest experience with the pipeline embolization device. *AJNR Am J Neuroradiol*. 2010;31:1139-1147

18. Wagner A, Cortsen M, Hauerberg J, Romner B, Wagner MP. Treatment of intracranial aneurysms. Reconstruction of the parent artery with flow-diverting (silk) stent. *Neuroradiology*. 2012;54:709-718
